# Supplementary material for: Sex-dependent neurobiological features of prenatal immune activation via TLR7
Source: PubMed Central journal article supplement (PMC7515834; doi:10.1038/s41380-018-0346-4), 2019-01-04

## SUPPLEMENTAL FIGURE CAPTIONS

**Fig. S1: Experiment sample size and graph of body weight.** **A)** Table of the sample sizes for each experiment including the number of litters per experiment. Behavior group 1 and 2 correspond to the groups denoted on Fig. 1A). **B)** Graph of body weight over weeks of age demonstrating a slight but significant decrease in weight gain following prenatal TLR7 activation. Weight was compared with a mixed-model with an autoregressive covariance structure. Mean  $\pm$  SEM

**Fig. S2: Prenatal TLR7 activation did not alter prepulse inhibition or spontaneous alternation behaviors.** **A)** Prenatal IMQ-treatment did not change baseline startle or **B)** prepulse inhibition in either male or females. There was a significant difference between males and females in baseline startle that is potentially due to weight differences. **C)** Prenatal IMQ-treatment did not affect spontaneous alternations or **D)** total number of entries suggesting no gross impairment in short-term memory. Mean  $\pm$  SEM

**Fig. S3: Sex-specific alterations in circadian period and determination of estrus cycle by temperature oscillations.** **A)** Prenatal IMQ-treatment did not change the length of the circadian period derived from the constant darkness period; however, there was a significantly shorter period overall in female mice. **B)** No significant alterations in body weight gain during the circadian experiment. **C)** Example of three traces from VEH- and IMQ-treated female mice illustrating the monophasic peak used to reliably discriminate the estrus from anestrus phase. An “E” denotes days identified as estrus phase. Only LD baseline period was used for further analysis. **D)** IMQ-treatment did not significantly alter temperature oscillations during the anestrus or **E)** estrus phase.

F) Increased activity during the dark phase during estrus in IMQ-treated mice, corresponding with changes in vehicle-treated females in Figure 3F, and shown as a change per each mouse in Figure 3G. \*  $P < 0.05$ , \*\*  $P < 0.01$  Mean  $\pm$  SEM

**Fig. S4 Prenatal TLR7 activation affects microglia morphology.** Morphological analysis of IBA-1 positive cells in dorsal striatum derived from sholl analysis (Figure 4D-G) demonstrating prenatal TLR7 activation led to: **A)** a significant increases total area of thresholded immunoreactivity, **B)** an increase in the total number of branches derived from automated sholl analysis, **C)** no change in the average radius of the cells. \*  $P < 0.05$ ,  $\wedge P < 0.05$  (main effect of VEH vs IMQ) Mean  $\pm$  SEM

**Fig. S5 Opposite changes in shared differentially expressed genes between males and females following prenatal TLR7 activation.** **A)** Heatmap of significant ( $P_{\text{adj}} < 0.05$ ) differentially expressed genes between males and females, 50 of 51 changed in the opposite direction. **B)** Gene Ontology networks of up- and downregulated shared between males and females.

**Fig. S6 RNA-seq and qPCR show comparable results.** RT-qPCR analysis from same RNA tissue samples for a selection of genes differentially expressed in RNAseq, showing correlation coefficient between qPCR fold change and RNAseq FPKM for males (*left*), females (*middle*) and the total fold change (*right*) for **A)** *Ano2*, **B)** *Gfap*, **C)** *Oprk1*, **D)** *Kcnj10*, and **E)** *Synpr*. \*  $P < 0.05$ , \*\*  $P < 0.01$

**Fig. S7 Cell type specific expression analysis of RNA-seq.** Proportion of differentially expressed genes from striatal transcriptomic analysis compared with top 500 genes in a cell-type specific enrichment database<sup>37</sup>. Results from upregulated differentially expressed transcripts from **A)** males and **B)** females and downregulated transcripts

from **C)** males and **D)** females. Total refers to number of differentially expressed genes from transcriptome analysis and number next to legend is number of overlapping transcripts that are enriched in the cell type.

**Fig. S8 Male cell type specific expression analysis of RNA-seq.** Results from a publicly accessible cell type specific expression analysis tool examining differentially expressed transcripts from male striatal transcriptomic analysis<sup>38</sup>.

**Fig. S9 Female cell type specific expression analysis of RNA-seq.** Results from a publicly accessible cell type specific expression analysis tool examining differentially expressed transcripts from female striatal transcriptomic analysis<sup>38</sup>.

# Supplemental Figure 1

A)

| Experiment           | Maternal Treatment | Sex    | Litters                  | Mice |   |    |
|----------------------|--------------------|--------|--------------------------|------|---|----|
| Behavior Group 1     | Vehicle            | Male   | 5 ( $\leq 3$ per litter) | 15   |   |    |
|                      | Vehicle            | Female |                          | 14   |   |    |
|                      | IMQ                | Male   | 5 ( $\leq 3$ per litter) | 15   |   |    |
|                      | IMQ                | Female |                          | 11   |   |    |
| Behavior Group 2     | Vehicle            | Male   | 6 ( $\leq 3$ per litter) | 18   |   |    |
|                      | Vehicle            | Female |                          | 12   |   |    |
|                      | IMQ                | Male   | 6 ( $\leq 3$ per litter) | 18   |   |    |
|                      | IMQ                | Female |                          | 9    |   |    |
| Circadian            | Vehicle            | Male   | 4 (= 2 per litter)       | 8    |   |    |
|                      | Vehicle            | Female |                          | 6    |   |    |
|                      | IMQ                | Male   | 3 (= 2 per litter)       | 6    |   |    |
|                      | IMQ                | Female |                          | 6    |   |    |
| IHC IBA-1            | Vehicle            | Male   | 3 ( $\leq 2$ per litter) | 5    | 3 |    |
|                      | Vehicle            | Female |                          | 3    | 3 |    |
|                      | IMQ                | Male   | 4 ( $\leq 2$ per litter) | 5    | 3 |    |
|                      | IMQ                | Female |                          | 4    | 3 |    |
| IHC IBA-1 Morphology | Vehicle            | Male   | 3 (= 1 per litter)       | 3    | 3 | 64 |
|                      | Vehicle            | Female |                          | 3    | 3 | 61 |
|                      | IMQ                | Male   | 3 (= 1 per litter)       | 3    | 3 | 60 |
|                      | IMQ                | Female |                          | 3    | 3 | 56 |
| RNA-seq              | Vehicle            | Male   | 3 (= 2 per litter)       | 6    |   |    |
|                      | Vehicle            | Female |                          | 6    |   |    |
|                      | IMQ                | Male   | 3 (= 2 per litter)       | 6    |   |    |
|                      | IMQ                | Female |                          | 6    |   |    |

B)

## Body Weight

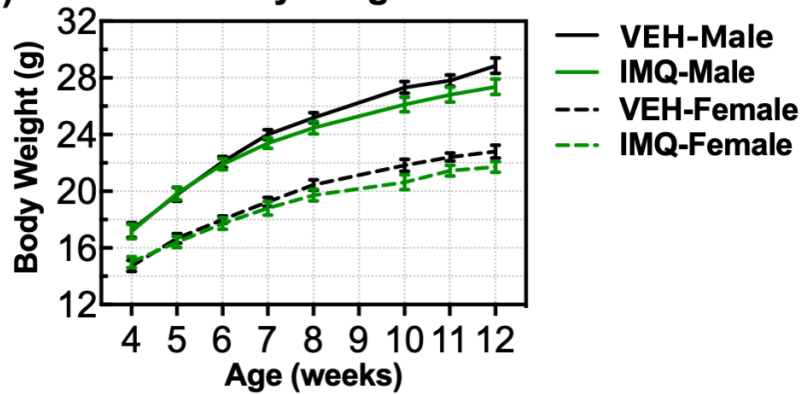

# Supplemental Figure 2

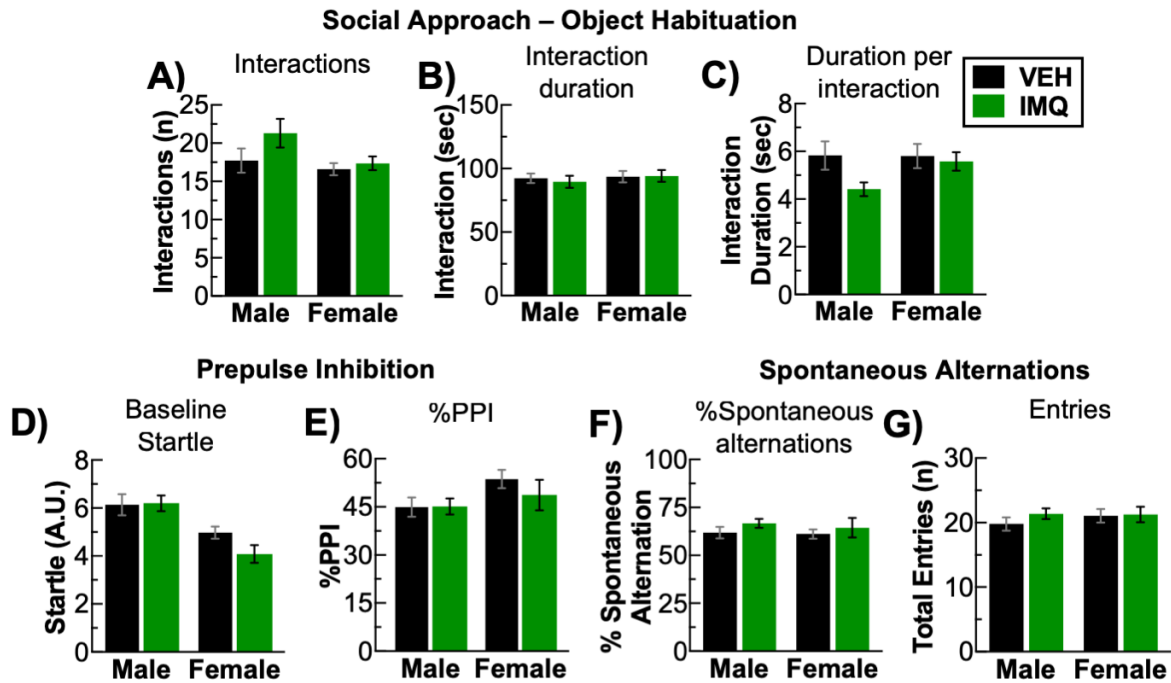

## H) Variance of Behavioral Tests (Brown-Forsythe Test)

|                                                                                                                                                                                                                                               |                                                                                                                                                                                                 |
|-----------------------------------------------------------------------------------------------------------------------------------------------------------------------------------------------------------------------------------------------|-------------------------------------------------------------------------------------------------------------------------------------------------------------------------------------------------|
| <b>Open Field</b><br>Distance (cm/min): $F_{3,50}=0.30, P=0.83$<br>Center (sec): $F_{3,50}=1.31, P=0.28$                                                                                                                                      | <b>Marble burying</b><br>$F_{3,51}=1.24, P=0.31$                                                                                                                                                |
| <b>Self grooming</b><br>$F_{3,51}=0.14, P=0.94$                                                                                                                                                                                               | <b>Spontaneous Alternations</b><br>$F_{3,49}=0.35, P=0.79$                                                                                                                                      |
| <b>Social Approach</b><br>Interactions (n): $F_{3,48}=1.54, P=0.22$<br>Interactions (sec): $F_{3,48}=0.35, P=0.79$<br>Avg. Duration per Interaction (sec): $F_{3,48}=1.77, P=0.17$<br>Distance: $F_{3,48}=1.01, P=0.39$                       | <b>Prepulse Inhibition</b><br>(Startle: $F_{3,50}=1.96, P=0.13$ )<br>(PPI: $F_{3,50}=0.23, P=0.23$ )                                                                                            |
| <b>Social Approach – Object Habituation</b><br>Interactions (n): $F_{3,48}=2.15, P=0.11$<br>(Interactions (sec): $F_{3,48}=2.01, P=0.13$ )<br>(Avg Duration per Interaction): $F_{3,48}=1.98, P=0.13$<br>(Distance: $F_{3,48}=0.91, P=0.44$ ) | <b>EPM</b><br>Open arm (sec): $F_{3,50}=0.23, P=0.88$                                                                                                                                           |
|                                                                                                                                                                                                                                               | <b>Reciprocal Social Interaction</b><br>(Interactions (n): $F_{3,48}=1.18, P=0.32$ )<br>(Interactions (s): $F_{3,48}=1.28, P=0.29$ )<br>(Avg Duration per Interaction): $F_{3,48}=2.02, P=0.12$ |

# Supplemental Figure 3

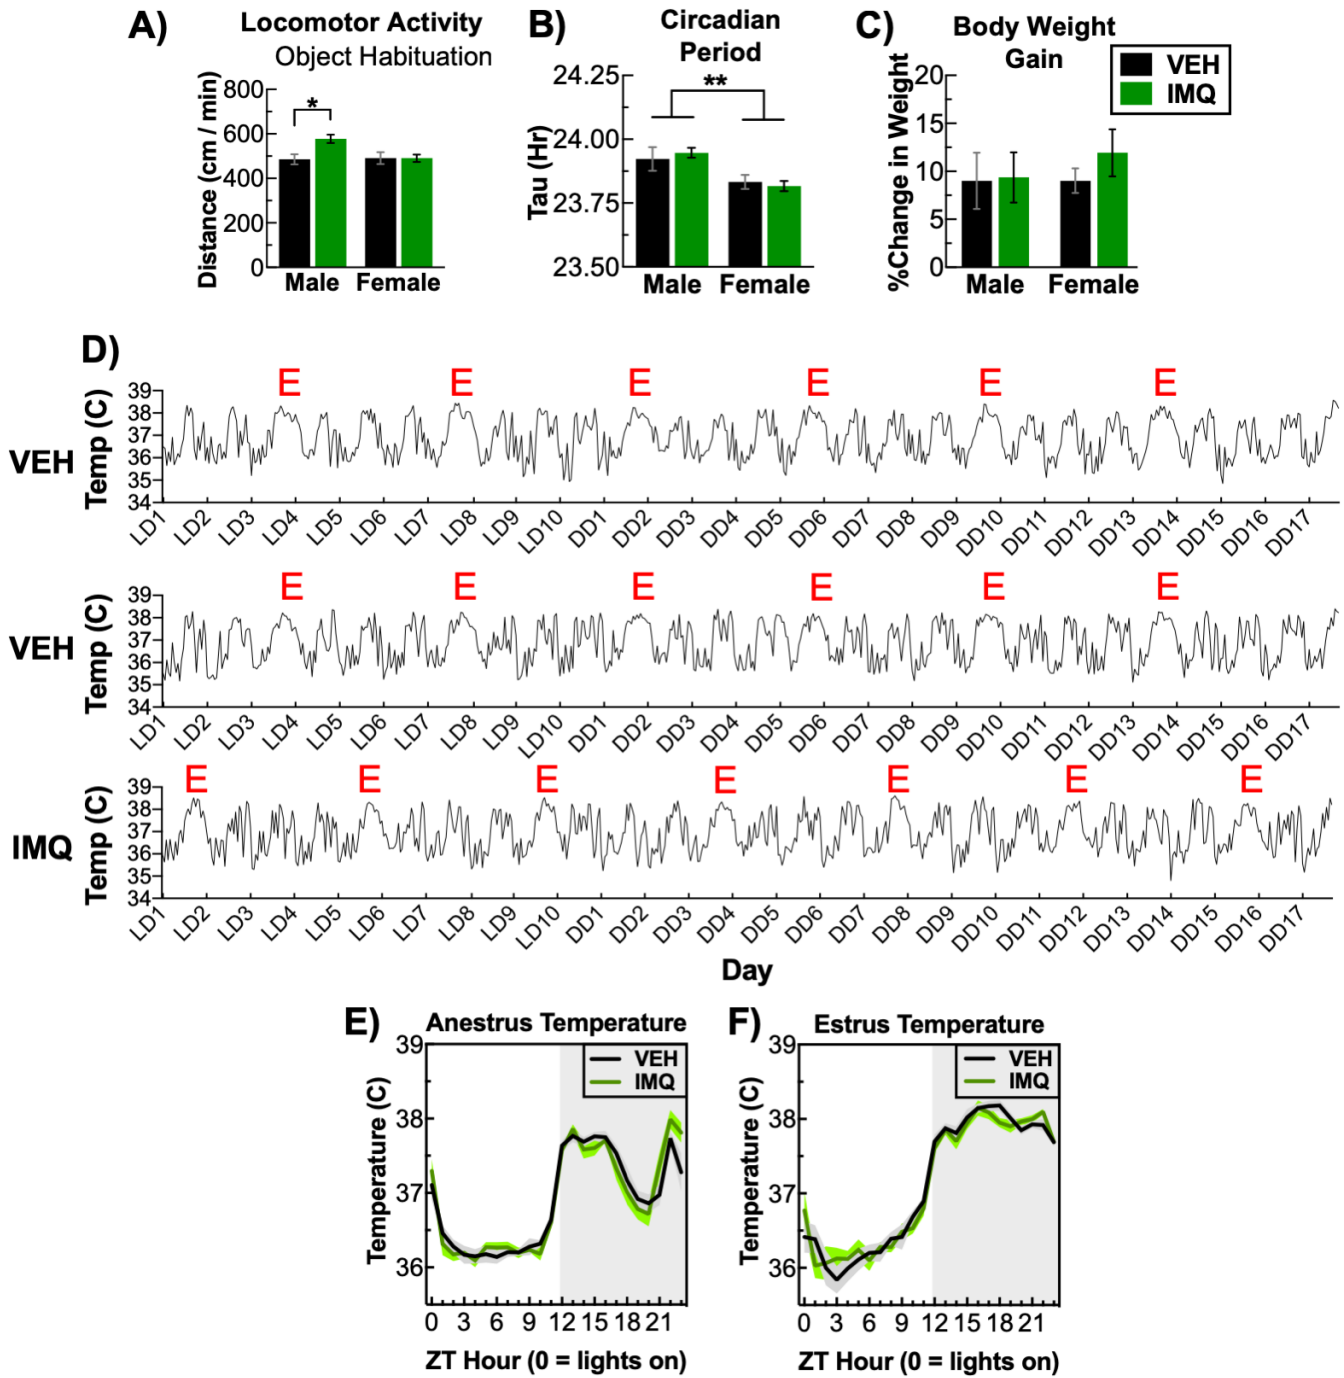

# Supplemental Figure 4

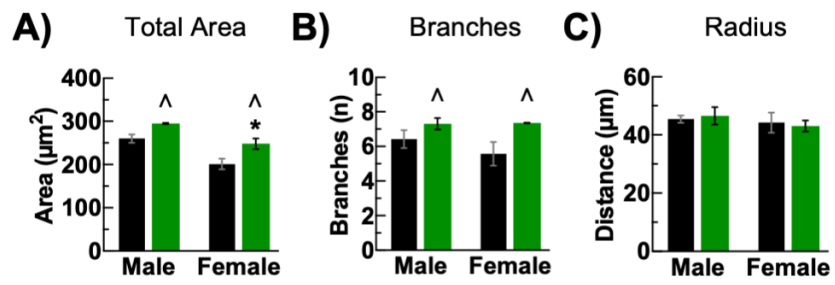

# Supplemental Figure 5

## A) Differentially Expressed Transcripts Shared Male and Female

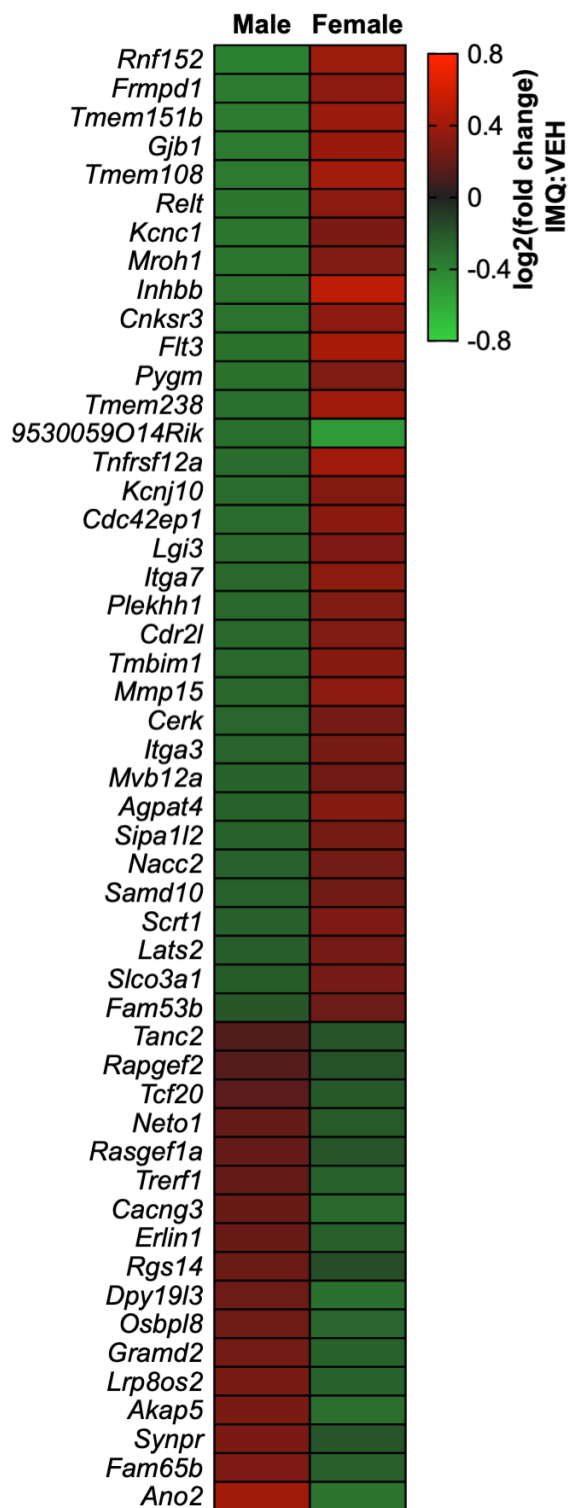

## B) Gene Ontology Shared Male and Female

| Males - Up                      | Males - Down                               |
|---------------------------------|--------------------------------------------|
| Females - Up                    | Females - Down                             |
| Ras protein signal transduction | cation channel complex                     |
|                                 | ion channel complex                        |
|                                 | transmembrane transporter complex          |
|                                 | transporter complex                        |
|                                 | voltage-gated ion channel activity         |
|                                 | voltage-gated channel activity             |
|                                 | gated channel activity                     |
|                                 | axon part                                  |
|                                 | cation channel activity                    |
|                                 | channel activity                           |
|                                 | passive transmembrane transporter activity |
|                                 | ion channel activity                       |
|                                 | substrate-specific channel activity        |
|                                 | voltage-gated cation channel activity      |
|                                 | potassium channel activity                 |
|                                 | potassium channel complex                  |
|                                 | cell leading edge                          |
|                                 | voltage-gated potassium channel complex    |
|                                 | leading edge membrane                      |
|                                 | neuron projection membrane                 |
|                                 | potassium ion transport                    |
|                                 | plasma membrane receptor complex           |
|                                 | axolemma                                   |
|                                 | potassium ion transmembrane transport      |
|                                 | cellular potassium ion transport           |
|                                 | neuromuscular junction                     |

| Males - Up                            | Males - Down                                 |
|---------------------------------------|----------------------------------------------|
| Females - Down                        | Females - Up                                 |
| anchoring junction                    | postsynapse                                  |
| adherens junction                     | asymmetric synapse                           |
| cell-cell junction                    | neuron to neuron synapse                     |
| potassium ion transport               | postsynaptic density                         |
| monovalent inorganic cation transport | postsynaptic specialization                  |
|                                       | synaptic membrane                            |
|                                       | postsynaptic membrane                        |
|                                       | regulation of synaptic plasticity            |
|                                       | axon part                                    |
|                                       | modulation of chemical synaptic transmission |
|                                       | cell leading edge                            |
|                                       | cytoplasmic region                           |
|                                       | filopodium                                   |
|                                       | terminal bouton                              |
|                                       | cognition                                    |
|                                       | dendrite morphogenesis                       |
|                                       | small GTPase mediated signal transduction    |



# Supplemental Figure 6

## RNAseq and qPCR comparison

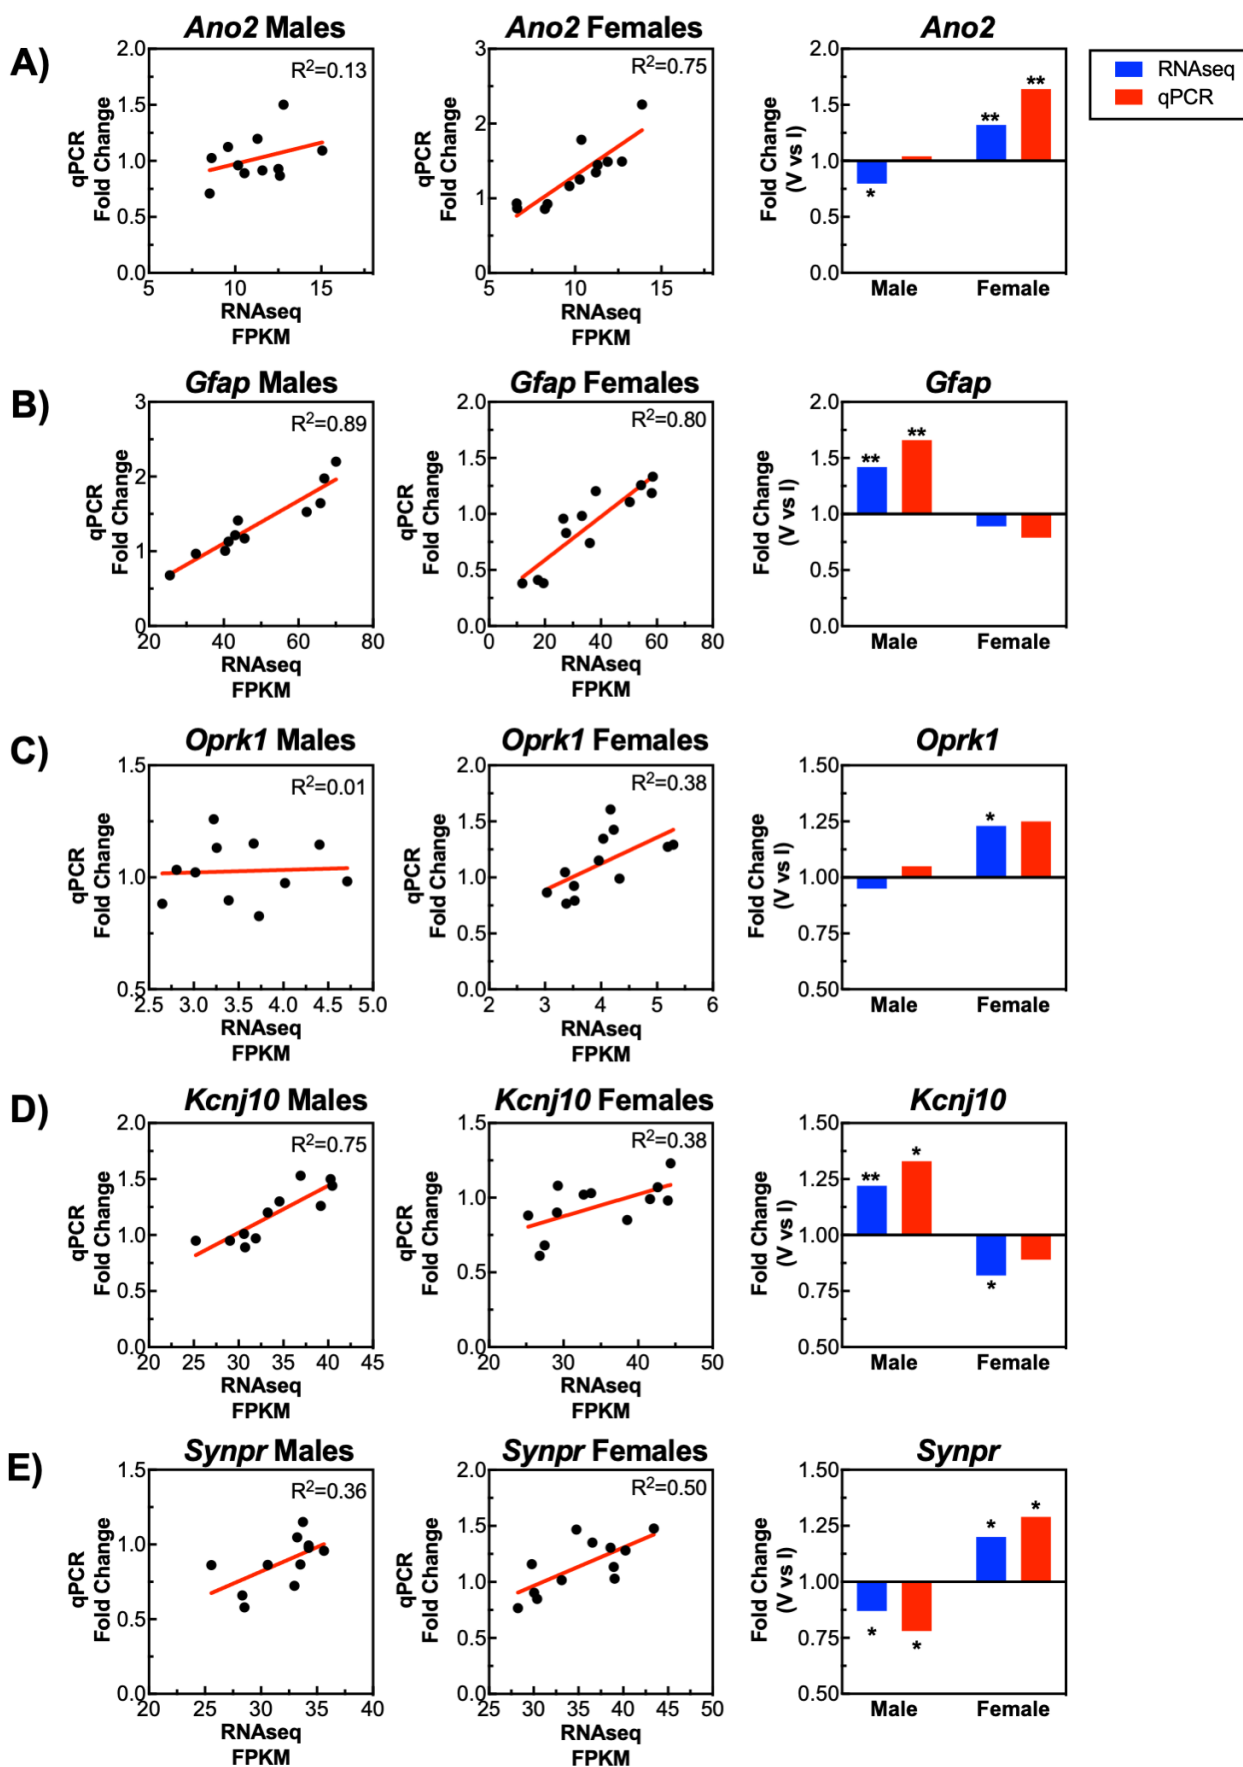

# Supplemental Figure 7

## Cell Type Enrichment *Upregulated Transcripts*

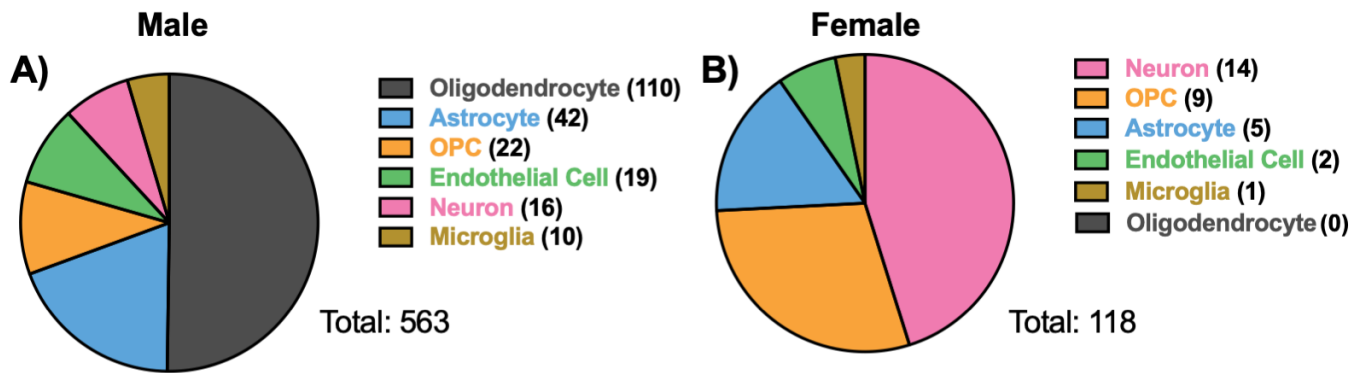

## *Downregulated Transcripts*

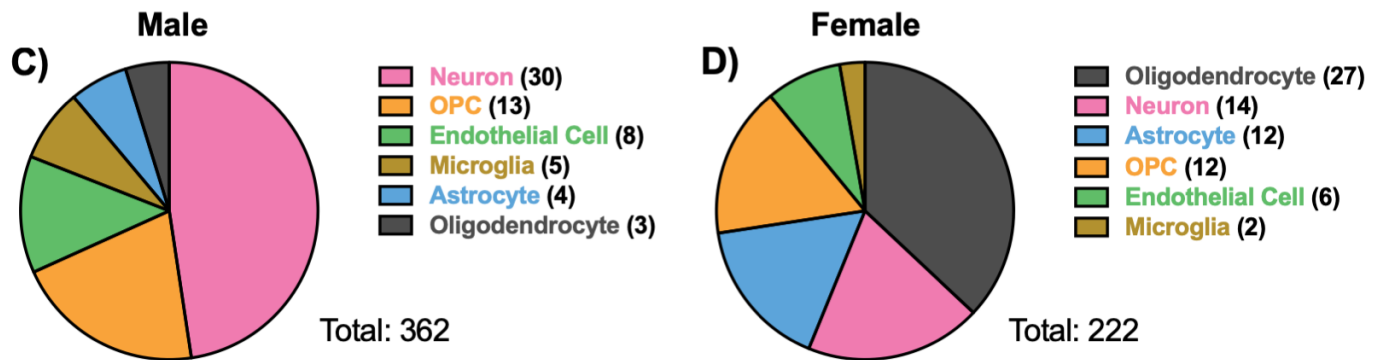

# Supplemental Figure 8

## Cell-type specific expression analysis

Males

### A) Upregulated

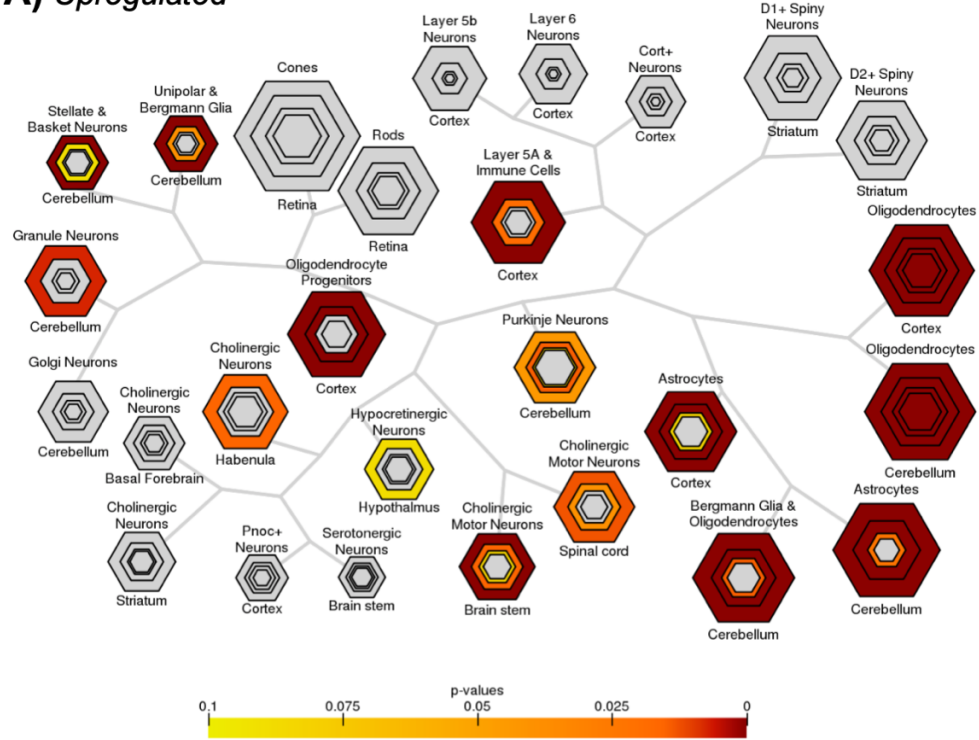

### B) Downregulated

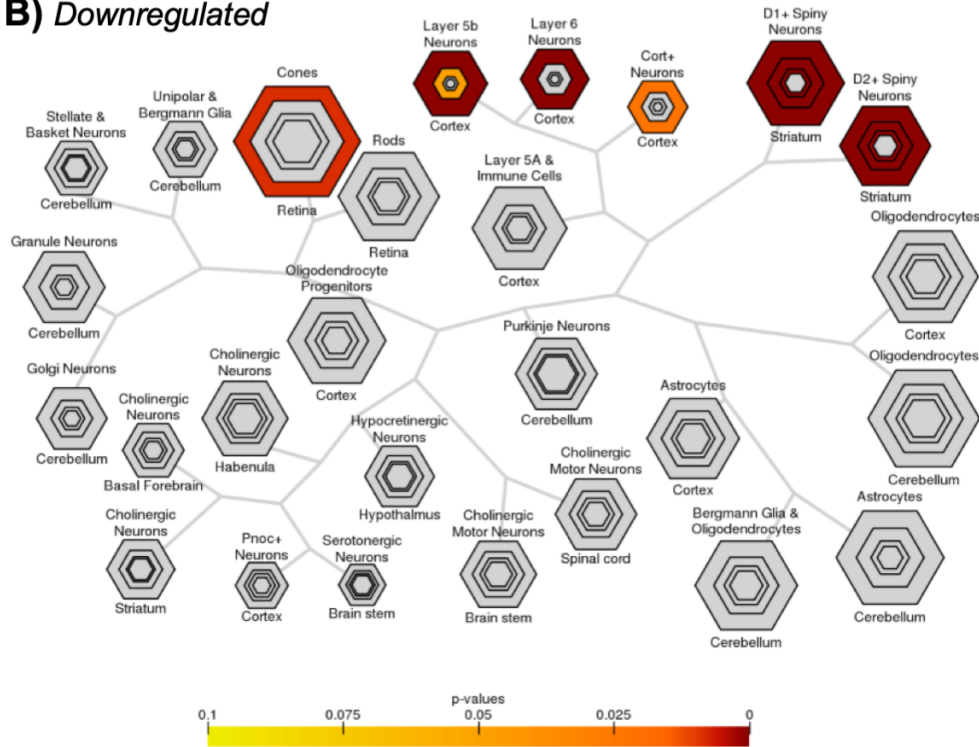

# Supplemental Figure 9

## Cell-type specific expression analysis

### Females

#### A) Upregulated

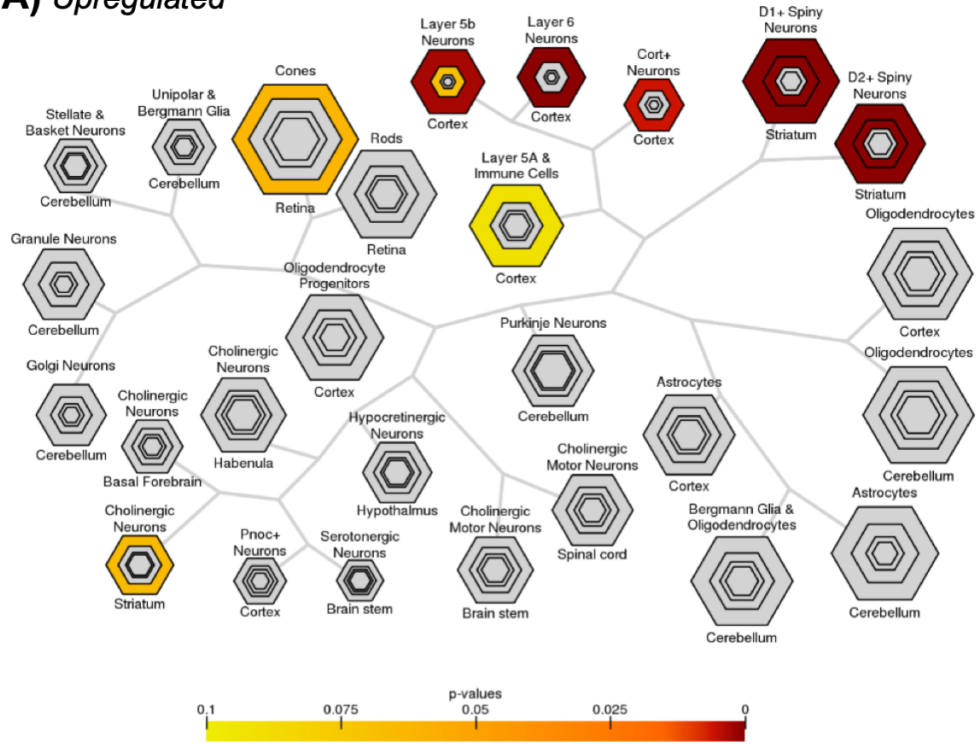

#### B) Downregulated

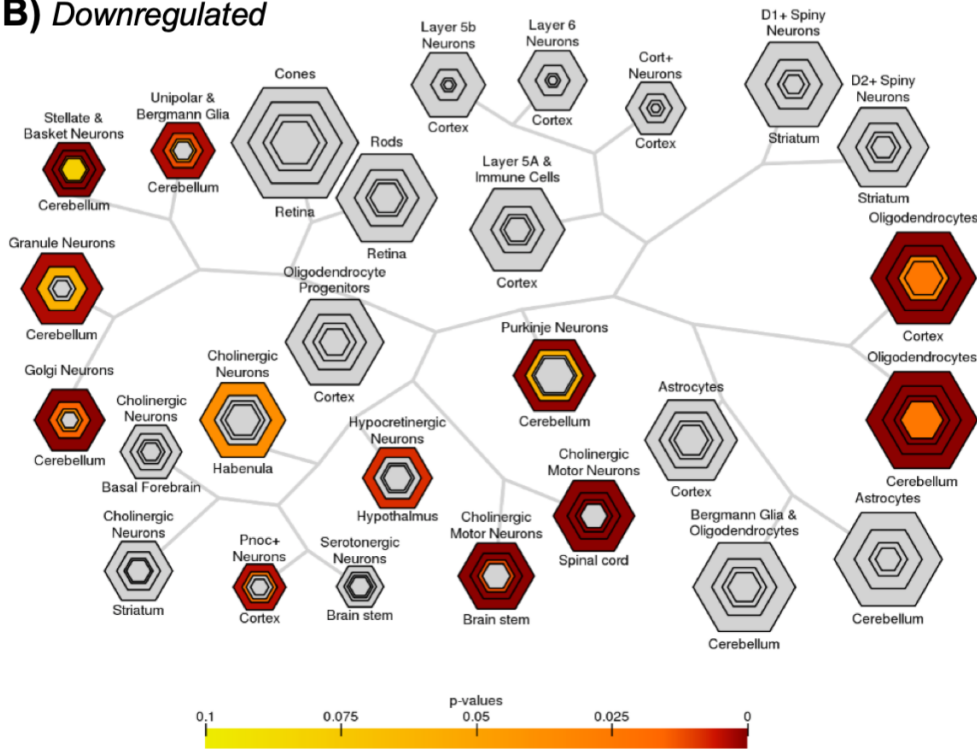

Supplement: 41380_2018_346_MOESM2_ESM.pdf [file 41380_2018_346_MOESM2_ESM.pdf]
